# Supplementary material
Source: publisher figshare collection journal article supplement (https://acs.figshare.com/ndownloader/files/5741277)
Supplement: Supplementary file 1 [file 5741277]

## Supporting Information

**Table A.**  $^1\text{H}$  NMR data for the six hydrogenation products. Values of  $J_{\text{calc.}}$  are from Table 4.

|                                                                                     | Ring proton: $\delta$ , mult.                                                                                                                    | $J$ found ( $J$ calc.)                                                                                                                                                                                                     | Side chain protons                                                                                                                                                                                                                                                                                                                                                              |
|-------------------------------------------------------------------------------------|--------------------------------------------------------------------------------------------------------------------------------------------------|----------------------------------------------------------------------------------------------------------------------------------------------------------------------------------------------------------------------------|---------------------------------------------------------------------------------------------------------------------------------------------------------------------------------------------------------------------------------------------------------------------------------------------------------------------------------------------------------------------------------|
| 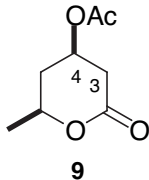   | $3\alpha$ : 2.92, ddd<br>$3\beta$ : 2.57, dd<br>$4\alpha$ : 5.21, dq<br>$5\alpha$ : 2.39, ddd<br>$5\beta$ : 1.62, ddd<br>$6\alpha$ : 4.39, ddq   | $3\alpha$ - $4\alpha$ : 6.2 (5.8)<br>$3\beta$ - $4\alpha$ : 6.6 (9.4)<br>$4\alpha$ - $5\alpha$ : 6.2 (5.0)<br>$4\alpha$ - $5\beta$ : 8.6 (10.3)<br>$5\alpha$ - $6\alpha$ : 2.9 (2.6)<br>$5\beta$ - $6\alpha$ : 11.7 (11.4) | $3\alpha$ - $3\beta$ : 17.2<br>$3\alpha$ - $5\alpha$ : 0.9<br>$\delta$ 2.07 (s, 3 H, OAc);<br>$\delta$ 1.43 (d, 3 H, C(6)-CH <sub>3</sub> )                                                                                                                                                                                                                                     |
|    | $3\alpha$ : 2.88, ddd<br>$3\beta$ : 2.54, dd<br>$4\alpha$ : 4.14, ddt<br>$5\alpha$ : 2.33, dddd<br>$5\beta$ : 1.59, ddd<br>$6\alpha$ : 4.33, ddq | $3\alpha$ - $4\alpha$ : 6.2<br>$3\beta$ - $4\alpha$ : 7.7<br>$4\alpha$ - $5\alpha$ : 5.5<br>$4\alpha$ - $5\beta$ : 9.2<br>$5\alpha$ - $6\alpha$ : 2.9<br>$5\beta$ - $6\alpha$ : 11.5                                       | $3\alpha$ - $3\beta$ : 17.1<br>$3\alpha$ - $5\alpha$ : 1.3<br>$\delta$ 4.80 (d, 1 H) and 4.78 (d, 1 H), $J_{\text{AB}}$ 7.3, OCH <sub>2</sub> O;<br>$\delta$ 3.71 (m, 2 H) and $\delta$ 3.55 (m, 2 H), OCH <sub>2</sub> CH <sub>2</sub> O;<br>$\delta$ 3.39 (s, 3 H, OCH <sub>3</sub> );<br>$\delta$ 1.41 (d, 3 H, C(6)-CH <sub>3</sub> )                                       |
|   | $3\alpha$ : 2.78, dq<br>$4\alpha$ : 5.29, ddd<br>$5\alpha$ : 2.51, ddd<br>$5\beta$ : 1.63, ddd<br>$6\alpha$ : 4.42, ddq                          | $3\alpha$ - $4\alpha$ : 4.7 (2.5)<br>$4\alpha$ - $5\alpha$ : 8.5 (7.2)<br>$4\alpha$ - $5\beta$ : 3.7 (3.6)<br>$5\alpha$ - $6\alpha$ : 4.0 (4.2)<br>$5\beta$ - $6\alpha$ : 11.6 (10.6)                                      | $5\alpha$ - $5\beta$ : 15.3<br>$\delta$ 2.06 (s, 3 H, OAc);<br>$\delta$ 1.40 (d, 3 H, C(6)-CH <sub>3</sub> );<br>$\delta$ 1.22 (d, 3 H, C(3)-CH <sub>3</sub> )                                                                                                                                                                                                                  |
|  | $3\alpha$ : 2.71, dq<br>$4\alpha$ : 4.19, dt<br>$5\alpha$ : 2.31, ddd<br>$5\beta$ : 1.76, ddd<br>$6\alpha$ : 4.38, ddq                           | $3\alpha$ - $4\alpha$ : 4.6<br>$4\alpha$ - $5\alpha$ : 7.6<br>$4\alpha$ - $5\beta$ : 4.0<br>$5\alpha$ - $6\alpha$ : 4.2<br>$5\beta$ - $6\alpha$ : 11.1                                                                     | $5\alpha$ - $5\beta$ : 14.8<br>$\delta$ 4.78 (d, 1 H) and 4.68 (d, 1 H), $J_{\text{AB}}$ 7.3, OCH <sub>2</sub> O;<br>$\delta$ 3.71 (m, 2 H) and $\delta$ 3.55 (t, 2 H, $J$ 4.6);<br>$\delta$ 3.39 (s, 3 H, OCH <sub>3</sub> ); all these H in MEMO;<br>$\delta$ 1.39 (d, 3 H, C(6)-CH <sub>3</sub> );<br>$\delta$ 1.28 (d, 3 H, C(3)-CH <sub>3</sub> )                          |
|  | $3\alpha$ : 2.92, dd<br>$3\beta$ : 2.56, dd<br>$4\alpha$ : 4.88, q<br>$5\beta$ : $\approx$ 1.86, obsc.<br>$6\alpha$ : 3.87, ddd                  | $3\alpha$ - $4\alpha$ : 5.8 (4.3)<br>$3\beta$ - $4\alpha$ : 6.2 (6.4)<br>$4\alpha$ - $5\beta$ : $\approx$ 7 (5.8)<br>$5\beta$ - $6\alpha$ : 10.3 (10.0)<br>$6\alpha$ -CH <sub>2</sub> : 7.5 and 3.1                        | $3\alpha$ - $3\beta$ : 17.1<br>$\delta$ 2.08 (s, 3 H, OAc);<br>$\delta \approx$ 1.86 (m, 1 H, obsc.) and $\delta$ 1.64 (septet, 1 H), C(6)-CH <sub>2</sub> ; $\delta$ 1.05 (d, 3 H, C(5)-CH <sub>3</sub> ); $\delta$ 1.04 (t, 3 H, Et)                                                                                                                                          |
|  | $3\alpha$ : 2.87, dd<br>$3\beta$ : 2.61, dd<br>$4\alpha$ : $\approx$ 3.72, obsc.<br>$5\beta$ : $\approx$ 1.81, obsc.<br>$6\alpha$ : 3.81, ddd    | $3\alpha$ - $4\alpha$ : 5.5<br>$3\beta$ - $4\alpha$ : 6.4<br>$4\alpha$ - $5\beta$ : obscured<br>$5\beta$ - $6\alpha$ : 10.3<br>$6\alpha$ -CH <sub>2</sub> : 7.3 and 2.9                                                    | $3\alpha$ - $3\beta$ : 16.8<br>$\delta$ 4.79 (d, 1 H) and 4.74 (d, 1 H), $J_{\text{AB}}$ 7.3; $\delta \approx$ 3.72 (2 H, obsc.) and $\delta$ 3.56 (m, 2 H); $\delta$ 3.40 (s, 3 H, OCH <sub>3</sub> );<br>$\delta \approx$ 1.84 (1 H, obsc.) and $\delta$ 1.62 (1 H, septet), C(6)-CH <sub>2</sub> ; $\delta$ 1.06 (d, 3 H, C(5)-CH <sub>3</sub> ); $\delta$ 1.03 (t, 3 H, Et) |

**Table B.** Energies<sup>a</sup> and dihedral angles calculated for the most stable conformers of the unsaturated lactones **3**, **5** and **14**.

|              | Con-<br>former | MM3*<br>energy | QM<br>energy | Dihedral angles <sup>a</sup> (degrees) |          |          |          |          |          |
|--------------|----------------|----------------|--------------|----------------------------------------|----------|----------|----------|----------|----------|
|              |                |                |              | $\tau_1$                               | $\tau_2$ | $\tau_3$ | $\tau_4$ | $\tau_5$ | $\tau_6$ |
| <b>3-01</b>  | 0.00           | 0.00           |              | -12.2                                  | 2.9      | 29.7     | -53.7    | 49.7     | -16.1    |
| <b>3-02</b>  | 0.19           | 1.47           |              | 7.4                                    | -1.0     | -26.1    | 46.7     | -45.2    | 17.6     |
| <b>3-03</b>  | 0.75           | 0.10           |              | -14.1                                  | 7.3      | 25.4     | -52.0    | 50.3     | -16.9    |
| <b>3-04</b>  | 0.95           | 1.82           |              | 13.5                                   | -3.0     | -28.1    | 49.2     | -43.7    | 12.0     |
| <b>5-01</b>  | 0.00           | 0.00           |              | 12.1                                   | -4.5     | -27.6    | 52.4     | -50.0    | 17.1     |
| <b>5-02</b>  | 0.19           | 1.57           |              | -9.9                                   | 2.4      | 26.7     | -48.0    | 45.6     | -16.2    |
| <b>5-03</b>  | 0.77           | 0.14           |              | -12.2                                  | 5.8      | 25.7     | -51.1    | 49.7     | -17.6    |
| <b>5-04</b>  | 0.93           | 2.19           |              | 14.6                                   | -3.2     | -29.1    | 50.2     | -43.9    | 11.1     |
| <b>14-01</b> | 0.00           | 0.00           |              | -9.5                                   | -1.0     | 30.1     | -49.2    | 44.5     | -14.3    |
| <b>14-02</b> | 0.67           | 0.61           |              | -11.5                                  | -0.5     | 31.2     | -50.4    | 44.2     | -12.4    |
| <b>14-03</b> | 1.18           | 1.90           |              | -9.4                                   | 2.8      | 25.2     | -46.6    | 45.5     | -16.8    |
| <b>14-04</b> | 1.86           | 2.54           |              | -8.6                                   | 2.7      | 26.0     | -48.4    | 48.3     | -18.9    |
| <b>14-05</b> | 2.17           | 1.11           |              | 7.2                                    | -3.2     | -24.0    | 48.9     | -51.3    | 21.8     |
| <b>14-06</b> | 2.36           | 0.14           |              | 7.6                                    | -5.9     | -21.3    | 46.5     | -50.9    | 22.5     |

<sup>a</sup> In kcal/mol. <sup>b</sup> The dihedral angles are defined as  $\tau_1 = \text{O}(1)\text{-C}(2)\text{-C}(3)\text{-C}(4)$ , etc.; the signs correspond to the enantiomers drawn in Scheme 1.

**Table C.** Selected conformers of  $\delta$ -lactones **9**, **11** and **17** found by MM and QM techniques.<sup>a,b</sup>

| Ring<br>type | MM2*                                                      | MM3*                            | MMFF                            | QM                              | Dihedral angles <sup>c</sup> (degrees)<br>$\tau_1 / \tau_2 / \tau_3 / \tau_4 / \tau_5 / \tau_6$ |                                  |
|--------------|-----------------------------------------------------------|---------------------------------|---------------------------------|---------------------------------|-------------------------------------------------------------------------------------------------|----------------------------------|
|              | $\Delta E/\text{OAc}/\text{Et}$                           | $\Delta E/\text{OAc}/\text{Et}$ | $\Delta E/\text{OAc}/\text{Et}$ | $\Delta E/\text{OAc}/\text{Et}$ |                                                                                                 |                                  |
| <b>9</b>     | <sup>3</sup> S <sub>1</sub>                               |                                 | 2.6/160                         |                                 | -36.9/63.5/-37.3/-13.5/44.5/-17.5                                                               |                                  |
|              | <sup>6</sup> S <sub>2</sub>                               | 2.4/163                         | 2.5/177                         |                                 | -58.3/22.5/29.8/-58.6/28.9/25.4                                                                 |                                  |
|              | B <sub>3,6</sub>                                          |                                 |                                 | 1.4/82                          | 44.5/-53.9/12.1/40.2/-55.7/11.2                                                                 |                                  |
|              | B <sub>3,6</sub>                                          | 0.0/173                         |                                 | 0.1/159                         | 1.5/162                                                                                         | 45.9/-40.5/-7.2/53.3/-53.5/3.1   |
|              | <sup>5</sup> C <sub>2</sub> - <sup>5</sup> H <sub>4</sub> | 0.5/165                         | 0.0/154                         | 0.0/159                         | 0.0/159                                                                                         | -25.8/45.0/-59.4/54.8/-37.3/22.3 |
|              | <sup>5</sup> C <sub>2</sub> - <sup>5</sup> H <sub>4</sub> | 1.6/168                         | 1.8/153                         | 1.4/158                         | 2.5/158                                                                                         | 32.3/-45.6/52.1/-43.6/30.1/-24.6 |
| <b>11</b>    | <sup>2</sup> C <sub>5</sub>                               |                                 | 1.1/157                         | 1.4/155                         | 37.6/-49.9/53.0/-41.3/29.4/-28.1                                                                |                                  |
|              | <sup>4</sup> E                                            | 1.5/167                         | 0.0/150                         |                                 | 36.4/-60.7/56.5/-28.1/1.1/-5.1                                                                  |                                  |
|              | <sup>5</sup> C <sub>2</sub>                               | 1.7/163                         | 0.0/86                          | 0.9/157                         | 1.0/156                                                                                         | -29.7/47.3/-59.6/53.0/-38.0/26.1 |
|              | B <sub>3,6</sub> - <sup>1</sup> S <sub>3</sub>            |                                 |                                 |                                 | 0.0/159                                                                                         | 45.0/-53.8/11.9/40.5/-55.4/10.4  |
|              | B <sub>3,6</sub> - <sup>2</sup> S <sub>6</sub>            | 0.0/173                         | 1.4/155                         | 0.0/158                         |                                                                                                 | 58.9/-38.2/16.4/58.6/-41.5/-16.1 |
| <b>17</b>    | <sup>2</sup> S <sub>6</sub>                               | 1.9/-59/-178                    |                                 |                                 | 45.4/-19.8/-31.5/64.5/-42.3/-12.4                                                               |                                  |
|              | <sup>3</sup> S <sub>1</sub>                               | 2.8/84/174                      |                                 | 2.2/85/176                      | -39.0/65.4/-38.1/-13.0/44.7/-17.0                                                               |                                  |
|              | <sup>2</sup> C <sub>5</sub>                               | 2.1/84/168                      | 1.9/150/171                     | 0.8/156/169                     | 2.2/156/172                                                                                     | 30.3/-41.5/50.5/-47.6/38.4/-29.5 |
|              | <sup>4</sup> E                                            | 2.0/164/170                     |                                 |                                 |                                                                                                 | 28.0/-53.6/55.6/-33.8/6.4/-3.0   |
|              | <sup>5</sup> C <sub>2</sub> - <sup>5</sup> H <sub>4</sub> | 1.1/80/179                      | 0.0/94/178                      | 0.2/85/180                      | 0.0/83/180                                                                                      | -24.8/43.2/-57.9/55.5/-40.8/24.3 |
|              | <sup>6</sup> S <sub>2</sub>                               | 1.7/162/172                     |                                 | 2.2/77/173                      |                                                                                                 | -52.6/23.9/27.5/-57.9/31.6/22.4  |
|              | <sup>1</sup> S <sub>3</sub>                               | 0.2/166/176                     |                                 | 0.8/155/179                     | 0.1/161/174                                                                                     | 40.2/-57.4/20.1/33.2/-56.5/17.1  |
|              | B <sub>3,6</sub> - <sup>2</sup> S <sub>6</sub>            | 0.0/79/-177                     |                                 | 0.0/81/-178                     | 0.8/81/-177                                                                                     | 44.9/-29.8/-20.6/60.9/-51.1/-2.5 |

<sup>a</sup> Only the lowest energy conformer is listed for each ring type; QM refers to HF/6-31G<sup>\*</sup>. <sup>b</sup> The headings  $\Delta E/OAc/Et$  refer to relative energy in kcal/mol, then orientations of the acetate and ethyl groups are given as the dihedral angles C(3)-C(4)-O-C(=O) and C(5)-C(6)-CH<sub>2</sub>-CH<sub>3</sub>, respectively. <sup>c</sup> The lactone ring dihedral angles are defined as  $\tau_1=O(1)-C(2)-C(3)-C(4)$ , etc. and refer to the QM conformer when this is available, otherwise to the MM2\* (for **9** <sup>3</sup>S<sub>1</sub> to the MMFF) conformer.

## Experimental

Compound **1** (commercially available) was prepared (75%) as described<sup>64</sup> but using EtOH instead of EtOAc to obtain a higher solubility. Compounds **2**<sup>4b</sup>, **5**<sup>4b</sup> and **13**<sup>4a</sup> were previously prepared. Catalytic hydrogenations are described below.

The stereochemical purities of the hydrogenation products were determined by fused silica capillary column GLC using DB-225, SE-52 and Carbowax 20 M columns mounted in a Hewlett-Packard 5830 A gas chromatograph (FID detector, electronic integration) using H<sub>2</sub> as carrier gas. To find the retention times of the minute amounts of minor isomers formed we used reference mixtures. Compounds **1**, **2** and **13** were reduced with ammonia borane to give  $\beta$ -hydroxy lactones as previously described for **1**.<sup>11</sup> This reduction method gave rather low stereoselectivities (66, 44 and 81% respectively) and is thus useful for making reference mixtures containing all possible stereoisomers. The mixtures of isomeric  $\beta$ -hydroxy lactones were converted to acetates and MEM ethers and these were analyzed by GLC. All diastereomers separated well, even the four isomers obtained from **2** (in the product ratios 30:44:8:18). NMR spectra of the crude product mixtures were compatible with the high stereochemical purities found by GLC.

Separations on silica gel were performed using Kieselgel 60 (Merck, 70-230 mesh). <sup>1</sup>H NMR spectra were recorded at 270 MHz on a JEOL GSX 270 spectrometer or at 400 MHz on a Varian Mercury spectrometer. <sup>13</sup>C NMR spectra were recorded at 100 MHz using a Varian Mercury spectrometer. The NMR solvent was CDCl<sub>3</sub>; tetramethylsilane was used as internal reference. Coupling constants (*J*) are given in Hz. HR-FAB mass spectra were measured using a JEOL JMS SX/SX102A instrument (direct inlet).

X-ray structural data were downloaded from the CSD database<sup>65</sup> and dihedral angles were then extracted using the Windows-based program DIAMOND<sup>66</sup>.

**Computational work.** Conformations of the saturated lactones **9**, **11**, and **17** and unsaturated lactones **3**, **5**, and **14** were found by exploring the conformational space using a Monte Carlo Multiple Minimum (MCMM) search in which new structures were generated by random changes

in torsional angles, followed by an energy minimization using the truncated Newton conjugate-gradient method.<sup>67</sup> The MM3\* force field of Macromodel 7.0<sup>67</sup> was used in the MCMM search of the lactones **3**, **5**, and **14**. The obtained conformers were used as starting geometries for HF/6-31G\* ab initio geometry optimizations performed in the MacSpartan Pro<sup>68</sup> program. The results are presented in Table B.

The MM2\*, MM3\* and MMFF force fields of Macromodel 7.0 were employed in three separate MCMM searches of each of the saturated lactones **9**, **11**, and **17**. Conformers with a relative energy exceeding +3.0 kcal/mol were discarded. For each compound the three sets of low energy conformers were used as starting geometries for HF/6-31G\* optimizations performed in the Jaguar program.<sup>69</sup> Duplicates were removed and the energy exclusion limit was again applied. This led to the results in Table C.

Conformations reported in Table 3 were generally obtained by QM optimization of input structures obtained by axial or equatorial substitution in ring types <sup>4</sup>H<sub>5</sub>, B<sub>3,6</sub>, <sup>1</sup>S<sub>3</sub>-B<sub>3,6</sub> and <sup>2</sup>S<sub>6</sub>-B<sub>3,6</sub>. The ab initio HF/6-31G\* optimizations were performed with the MacSpartan Pro program using default settings and the convergence criterion keyword TOLG=0.00001.

The other ab initio HF/6-31G\* optimizations, i.e. torsional drivers (Figures 4 and 5), were performed with the Jaguar 4.2 program using default settings and the ultrafine grid accuracy. Transition states were verified to have a hessian yielding a single imaginary frequency and the transition vibrational mode was animated and visually inspected.

Boltzmann-averaged coupling constants were calculated using the extended Karplus equation<sup>70</sup> implemented in Macromodel 7.0.

## Computational results

### Compound **3**

| Conformer | 6-31g* (hartrees) | $\Delta$ 6-31G* (kcal/mol) |
|-----------|-------------------|----------------------------|
| 30001     | -608.2405261      | 0.000                      |
| 30002     | -608.2381783      | 1.473                      |
| 30003     | -608.2403616      | 0.103                      |
| 30004     | -608.2376250      | 1.820                      |

### Compound **5**

| Conformer | 6-31g* (hartrees) | $\Delta$ 6-31G* (kcal/mol) |
|-----------|-------------------|----------------------------|
| 50001     | -647.2799215      | 0.000                      |
| 50002     | -647.2774195      | 1.570                      |
| 50003     | -647.2796942      | 0.143                      |

50004        -647.2764320        2.190

#### Compound 14

| Conformer | 6-31g* (hartrees) | $\Delta$ 6-31G* (kcal/mol) |
|-----------|-------------------|----------------------------|
| 140001    | -686.3078038      | 0.000                      |
| 140002    | -686.3068384      | 0.606                      |
| 140003    | -686.3047808      | 1.897                      |
| 140004    | -686.3037522      | 2.542                      |
| 140005    | -686.306033       | 1.111                      |
| 140006    | -686.307577       | 0.142                      |

#### Compound 9

| hartrees    | kcal/mol | ring type                                                 | tau-6 |
|-------------|----------|-----------------------------------------------------------|-------|
| -609.424118 | 1.37     | B <sub>3,6</sub>                                          | 11.2  |
| -609.423992 | 1.45     | B <sub>3,6</sub>                                          | 3.1   |
| -609.426305 | 0.00     | <sup>5</sup> C <sub>2</sub> - <sup>5</sup> H <sub>4</sub> | 22.3  |
| -609.425591 | 0.45     | <sup>5</sup> C <sub>2</sub> - <sup>5</sup> H <sub>4</sub> | 21.1  |
| -609.422269 | 2.53     | <sup>2</sup> C <sub>5</sub> - <sup>4</sup> H <sub>5</sub> | -24.6 |
| -609.422150 | 2.61     | <sup>2</sup> C <sub>5</sub> - <sup>4</sup> H <sub>5</sub> | -23.9 |

#### Compound 11

| hartrees    | kcal/mol | ring type                   | tau-6 |
|-------------|----------|-----------------------------|-------|
| -648.457557 | 1.40     | <sup>2</sup> C <sub>5</sub> | -28.1 |
| -648.458197 | 1.00     | <sup>5</sup> C <sub>2</sub> | 26.1  |
| -648.457490 | 1.44     | <sup>5</sup> C <sub>2</sub> | 23.9  |
| -648.459784 | 0.00     | B <sub>3,6</sub>            | 10.4  |

#### Compound 17

| hartrees    | kcal/mol | ring type                                                 | tau-6 |
|-------------|----------|-----------------------------------------------------------|-------|
| -687.489820 | 2.17     | <sup>2</sup> C <sub>5</sub>                               | -29.5 |
| -687.489446 | 2.41     | <sup>2</sup> C <sub>5</sub>                               | -29.9 |
| -687.493281 | 0.00     | <sup>5</sup> C <sub>2</sub> - <sup>5</sup> H <sub>4</sub> | 24.3  |
| -687.492610 | 0.42     | <sup>5</sup> C <sub>2</sub> - <sup>5</sup> H <sub>4</sub> | 20.1  |
| -687.493062 | 0.14     | <sup>1</sup> S <sub>3</sub>                               | 17.1  |
| -687.492717 | 0.35     | <sup>1</sup> S <sub>3</sub>                               | 15.7  |
| -687.491174 | 1.32     | <sup>1</sup> S <sub>3</sub>                               | 13.1  |
| -687.489238 | 2.54     | <sup>1</sup> S <sub>3</sub>                               | 16.7  |
| -687.489369 | 2.45     | <sup>1</sup> S <sub>3</sub>                               | 18.8  |
| -687.492047 | 0.77     | B <sub>3,6</sub> - <sup>2</sup> S <sub>6</sub>            | -2.5  |
| -687.491080 | 1.38     | B <sub>3,6</sub> - <sup>2</sup> S <sub>6</sub>            | -5.3  |

#### $\delta$ -Valerolactone

|                                                           | 6-31g* (hartrees) | $\Delta$ 6-31G* (kcal/mol) |
|-----------------------------------------------------------|-------------------|----------------------------|
| <sup>4</sup> H <sub>5</sub> - <sup>2</sup> C <sub>5</sub> | -343.7366456      | 0.000                      |
| B <sub>3,6</sub>                                          | -343.7347981      | 1.159                      |

|      |              |       |
|------|--------------|-------|
| TS-1 | -343.7335737 | 1.928 |
| TS-2 | -343.7318793 | 2.991 |

$\delta$ -Valerolactone, locked (“ideal”) conformations

| ring type        | locked torsions  | 6-31g* (hartrees) | $\Delta$ 6-31G* (kcal/mol)   |
|------------------|------------------|-------------------|------------------------------|
| ${}^4\text{H}_5$ | 6-1-2-3          | -343.7359326      | 0.447                        |
| $\text{B}_{3,6}$ | 6-1-2-3, 3-4-5-6 | -343.7345989      | 1.284                        |
| ${}^4\text{E}$   | 5-6-1-2, 6-1-2-3 | -343.7340462      | 1.631                        |
| $\text{E}_5$     | 6-1-2-3, 1-2-3-4 | -343.7352873      | 0.852                        |
| skew             | 4-5-6-2          | -343.7333903      | 2.043                        |
| skew             | 1-2-3-5, 4-5-6-2 | -343.7328895      | 2.357                        |
| skew             | 1-2-3-5          | -343.7328876      | 2.358                        |
| skew             | 5-6-1-3          | -343.7340497      | 1.629                        |
| skew             | 5-6-1-3, 2-3-4-6 | -343.7283413      | 5.211                        |
| skew             | 2-3-4-6          | -343.7355192      | 0.707                        |
| skew             | 3-4-5-1          | -343.7342311      | 1.515                        |
| skew             | 3-4-5-1, 6-1-2-4 | -343.7323632      | 2.687                        |
| skew             | 6-1-2-4          | -343.7364384      | 0.130 (3-5 on the same side) |
| ${}^1\text{C}_4$ | 2-3-5-6          | -343.7352006      | 0.907                        |
| ${}^2\text{C}_5$ | 3-4-6-1          | -343.7364609      | 0.116                        |
| ${}^3\text{C}_6$ | 1-2-4-5          | -343.7343126      | 1.464                        |

**$\delta$ -Valerolactone derivatives (cf. Table 5)**

3-methyl

| ring type                           | 6-31g* (hartrees) | $\Delta$ 6-31G* (kcal/mol) |
|-------------------------------------|-------------------|----------------------------|
| ${}^2\text{C}_5$                    | -382.7721626      | 0.000                      |
| $\text{B}_{3,6}$                    | -382.7710526      | 0.697                      |
| ${}^4\text{H}_5$ - ${}^2\text{C}_5$ | -382.7698223      | 1.469                      |

6-methyl

| ring type                           | 6-31g* (hartrees) | $\Delta$ 6-31G* (kcal/mol) |
|-------------------------------------|-------------------|----------------------------|
| ${}^4\text{H}_5$ - ${}^2\text{C}_5$ | -382.7769748      | 0.000                      |
| $\text{B}_{3,6}$                    | -382.7751446      | 1.148                      |
| ${}^4\text{H}_5$ - ${}^2\text{C}_5$ | -382.7742587      | 1.704                      |

cis-3,6-dimethyl

| ring type                           | 6-31g* (hartrees) | $\Delta$ 6-31G* (kcal/mol) |
|-------------------------------------|-------------------|----------------------------|
| ${}^2\text{C}_5$                    | -421.8097981      | 0.983                      |
| ${}^4\text{H}_5$ - ${}^2\text{C}_5$ | -421.8101597      | 0.756                      |
| $\text{B}_{3,6}$                    | -421.8113649      | 0.000                      |

3-tert-butyl

| ring type                           | 6-31g* (hartrees) | $\Delta$ 6-31G* (kcal/mol) |
|-------------------------------------|-------------------|----------------------------|
| $\text{B}_{3,6}$ - ${}^2\text{S}_6$ | -499.8661435      | 0.00                       |
| ${}^2\text{C}_5$                    | -499.8659386      | 0.13                       |

### 3-methoxy

| ring type         | 6-31g* (hartrees) | $\Delta$ 6-31G* (kcal/mol) |
|-------------------|-------------------|----------------------------|
| $^2C_5$           | -457.6104439      | 0.00                       |
| $^4H_5$ - $^2C_5$ | -457.6101708      | 0.17                       |
| $B_{3,6}$ (4exo)  | -457.6095431      | 0.57                       |
| $B_{3,6}$ (4endo) | -457.6090714      | 0.86                       |

### 4-methoxy

| ring type         | 6-31g* (hartrees) | $\Delta$ 6-31G* (kcal/mol) |
|-------------------|-------------------|----------------------------|
| $^2C_5$           | -457.6153987      | 0.00                       |
| $^2C_5$           | -457.6148084      | 0.37                       |
| $^4H_5$ - $^2C_5$ | -457.6141055      | 0.81                       |
| $^4H_5$ - $^2C_5$ | -457.6140350      | 0.86                       |
| $^2S_6$           | -457.6126329      | 1.74                       |
| $^2S_6$           | -457.6125271      | 1.80                       |
| $B_{3,6}$         | -457.6115179      | 2.44                       |
| $B_{3,6}$         | -457.6110939      | 2.70                       |

### 5-methoxy

| ring type           | 6-31g* (hartrees) | $\Delta$ 6-31G* (kcal/mol) |
|---------------------|-------------------|----------------------------|
| $^4H_5$             | -457.6132887      | 0.00                       |
| $^4H_5$             | -457.6129319      | 0.22                       |
| $^4H_5$ - $^2C_5$   | -457.6131965      | 0.06                       |
| $^4H_5$ - $^2C_5$   | -457.6127181      | 0.36                       |
| $B_{3,6}$ - $^1S_3$ | -457.6122490      | 0.65                       |
| $B_{3,6}$ - $^1S_3$ | -457.6109796      | 1.45                       |
| $^1S_3$             | -457.6100049      | 2.06                       |
| $^1S_3$             | -457.6103495      | 1.84                       |

### Model compound 20

| ring type           | 6-31g* (hartrees) | $\Delta$ 6-31G* (kcal/mol) |
|---------------------|-------------------|----------------------------|
| $^1S_3$ - $B_{3,6}$ | -649.5628382      | 0.00                       |
| $^4H_5$ (ax OMe)    | -649.5619369      | 0.57                       |
| $^4H_5$ (ax OMe)    | -649.5617185      | 0.70                       |
| $^5H_4$ (eq OMe)    | -649.5610818      | 1.10                       |

**4-Acetoxy-6-methyl-1-oxa-3-cyclohexen-2-one (3)** was prepared as described for **5**<sup>4b</sup> using acetyl chloride and *N*-ethyl-diisopropylamine and was obtained as an oil; yield >95%; <sup>1</sup>H NMR:  $\delta$  5.92 (dd, 1 H, *J* 2.2 and 1.0, H-3), 4.63 (ddq, 1 H, *J* 11.2, 4.2, 6.4, H-6), 2.64 (ddd, 1 H, *J* 17.6, 11.2, 2.2, H-5 $\beta$ ), 2.49 (ddd, 1 H, *J* 17.6, 4.2, 1.0, H-5 $\alpha$ ), 2.24 (s, 3 H, OAc), 1.47 (d, 3 H, *J* 6.4, CHCH<sub>3</sub>).

**6-methyl-4-[(2-methoxyethoxy)methoxy]-1-oxa-3-cyclohexen-2-one (4)** . The tetrabutylammonium salt of **1** (4 mmol) was extracted from water (60 mL) into dichloromethane (3 x 150 mL). After concentration and drying ( $\text{Na}_2\text{SO}_4$ ), anhydrous  $\text{K}_2\text{CO}_3$  (40 mmol) and MEMCl (6 mmol) were added to the solution (15 mL) of the tetrabutylammonium salt and the compounds were allowed to react for 15 min. The mixture was filtered, the solvent evaporated and the residue partitioned between  $\text{Et}_2\text{O}$  and dilute aqueous  $\text{NaHCO}_3$ . After three additional extractions with  $\text{Et}_2\text{O}$  the extracts were combined and the solvent was evaporated. Dichloromethane was added. After drying ( $\text{Na}_2\text{SO}_4$ ) and concentration, **4** was obtained in a purity of *ca.* 90%; the major contaminant was 2-methoxyethanol. The crude product was purified on a silica gel column to give **4** in a 73% yield;  $^1\text{H}$  NMR:  $\delta$  5.33 (1 H, three equal intensity resonances with spacings *ca.* 0.6 and 1.0 Hz, H-3), 5.20 (1 H, *J* 6.4,  $\text{OCH}_2\text{O}$ ), 5.17 (1 H, *J* 6.4,  $\text{OCH}_2\text{O}$ ), 4.55 (ddq, 1 H, *J* 11.2, 4.6, 6.3, H-6), 3.79 (m, 2 H,  $\text{OCH}_2\text{CH}_2\text{O}$ ), 3.56 (m, 2 H,  $\text{OCH}_2\text{CH}_2\text{O}$ ), 3.39 (s, 3 H,  $\text{OCH}_3$ ), 2.47 (ddd, 1 H, *J* 17.2, 11.2, 1.3, H-5 $\beta$ ), 2.36 (dd, 1 H, *J* 17.2, 4.4, H-5 $\alpha$ ), 1.44 (d, 3 H, *J* 6.3,  $\text{CHCH}_3$ ).

**3,6-dimethyl-4-[(2-methoxyethoxy)methoxy]-1-oxa-3-cyclohexen-2-one (6)**. A solution of **2** (1 mmol) in acetonitrile (5 mL) was added to a stirred suspension of sodium hydride (1.45 mmol, freed from stabilizing mineral oil) in acetonitrile (3 mL). Hydrogen was evolved and a light gray precipitate was formed. A solution of MEM-Cl (1.2 mmol) in acetonitrile was added. After 25 min the reaction mixture was acidified with acetic acid (1 mmol) and the solvent evaporated. The residue was partitioned between  $\text{Et}_2\text{O}$  (30 mL) and saturated aq.  $\text{NaHCO}_3$  (10 mmol). The  $\text{Et}_2\text{O}$  phase was separated, the solvent was evaporated and dichloromethane added. Drying ( $\text{Na}_2\text{SO}_4$ ), evaporation of the solvent and purification on silica gel gave **6** in a 62% yield.  $^1\text{H}$  NMR:  $\delta$  5.18 (s, 2 H,  $\text{OCH}_2\text{O}$ ), 4.47 (ddq, 1 H, *J* 11.7, 4.0, 6.2, H-6), 3.79 (m, 2 H,  $\text{OCH}_2\text{CH}_2\text{O}$ ), 3.55 (m, 2 H,  $\text{OCH}_2\text{CH}_2\text{O}$ ), 3.38 (s, 3 H,  $\text{OCH}_3$ ), 2.69 (ddq, 1 H, *J* 17.2, 4.0, 1.1, H-5 $\alpha$ ), 2.52 (ddd, 1 H, *J* 17.2, 11.7, 2.2, H-5 $\beta$ ), 1.82 (dd, 3 H, *J* 2.2, 1.1, C(3)- $\text{CH}_3$ ), 1.44 (d, 3 H, *J* 6.2,  $\text{CHCH}_3$ ).

**cis-4-Acetoxy-6-methyl-1-oxacyclohexan-2-one (9)** and **trans-4-Acetoxy-6-methyl-1-oxacyclohexan-2-one** were prepared as a mixture of *cis* and *trans* isomers from a mixture of the corresponding alcohols<sup>11</sup> (*cis-7/trans-7*, *ca.* 3:1). **Cis acetate (9)**:  $^1\text{H}$  NMR data are given in Table A.  $^{13}\text{C}$  NMR:  $\delta$  170.1, 169.7, 73.0, 66.0, 36.2, 35.6, 21.1, 21.0. **Trans acetate**:  $^1\text{H}$  NMR:  $\delta$  5.25 (dq, 1 H, *J* 5.2, 3.6, H-4), 4.72 (ddq, 1 H, *J* 11.3, 2.9, 6.4, H-6), 2.78 (dd, 1 H, *J* 18.2, 5.2, H-3),



2.70 (ddd, 1 H,  $J$  18.0, 3.5, 1.7, H-3), *ca.* 2.10 (1 H, partly obscured by OAc, H-5- $\alpha$ ), 2.08 (s, 3 H, OAc), 1.78 (ddd, 1 H,  $J$  14.8, 11.4, 3.4, H-5- $\beta$ ), 1.42 (d, 3 H,  $J$  6.7, C(6)-CH<sub>3</sub>). <sup>13</sup>C NMR:  $\delta$  170.0, 169.1, 72.6, 65.7, 35.1, 34.5, 21.3, 21.0. The 90 MHz <sup>1</sup>H NMR data in the literature<sup>72</sup> show moderate agreement with ours.

**trans-4-Acetoxy-6-ethyl-5-methyl-1-oxa-3-cyclohexen-2-one (14)** was prepared in the same way as **3** and was obtained as an oil; yield >95%; <sup>1</sup>H NMR:  $\delta$  5.93 (d, 1 H,  $J$  1.3, H-3), 4.12 (q, 1 H,  $J$  6.4, H-6), 2.69 (d of pentet, 1 H,  $J$  1.3, 7.0, H-5), 2.25 (s, 3 H, OAc), 1.81 (dq, 2 H,  $J$  6.1 and 7.4, CH<sub>2</sub>CH<sub>3</sub>) 1.19 (d, 3 H,  $J$  7.1, C(5)-CH<sub>3</sub>) 1.05 (t, 3 H,  $J$  7.4, CH<sub>2</sub>CH<sub>3</sub>).

**trans-6-ethyl-5-methyl-4-[(2-methoxyethoxy)methoxy]-1-oxa-3-cyclohexen-2-one (15)** was prepared by the method used for **4**. The crude product was purified on a silica gel column to give **15** in a 94% yield; <sup>1</sup>H NMR:  $\delta$  5.28 (s, 1 H, H-3), 5.18 (s, 2 H, OCH<sub>2</sub>O), 4.04 (q, 1 H,  $J$  6.4, H-6), 3.80-3.76 (m, 2 H, OCH<sub>2</sub>CH<sub>2</sub>O), 3.59-3.54 (m, 2 H, OCH<sub>2</sub>CH<sub>2</sub>O), 3.39 (s, 3 H, OCH<sub>3</sub>), 2.51 (pentet, 1 H,  $J$  7.1, H-5), 1.76 (pentet-like, 2 H,  $J$  7.1, CH<sub>2</sub>CH<sub>3</sub>), 1.21 (d, 3 H,  $J$  7.0, C(5)-CH<sub>3</sub>), 1.04 (t, 3 H,  $J$  7.4, CH<sub>2</sub>CH<sub>3</sub>).

**Hydrogenation of 1, 2 and 13.** All catalytic hydrogenations were run at 20-22 °C. Conditions in hydrogenations using W2 Raney-Ni: for **1**, EtOH, 5 atm H<sub>2</sub>, 3 days; for **2**, THF, 30 atm H<sub>2</sub>, 2 days; for **13**, EtOAc, 5 atm H<sub>2</sub>, 17 h. For hydrogenations of **1, 2 and 13** using PtO<sub>2</sub> (Adams' catalyst): 5 atm H<sub>2</sub>, EtOAc, Parr apparatus, 20 h.

**Hydrogenation of enol acetates and enol MEM ethers.** Diethyl ether was used as solvent; 20-22 °C; catalysts were 10% Pd/C (Fluka, batch number 258624785; 0.04-0.09 equiv. Pd for the enol acetates and 0.09-0.32 equiv. for the enol MEM ethers; see also next paragraph) or 5 % Rh/C (Merck-Schuchardt, batch number 1175926). For **5** and **6** a 5 atm pressure was applied (Parr apparatus); the other enol acetates and enol MEM ethers were reduced at 1 atm pressure. The reaction mixtures obtained from the enol acetates contained acetic acid which was removed by washing first with a minimum amount of conc. aq. NaHCO<sub>3</sub> and then with a little brine. After drying (Na<sub>2</sub>SO<sub>4</sub>), filtration and concentration the product mixtures were analysed by GLC and <sup>1</sup>H NMR spectroscopy. All stereoselectivities are presented in Table 1. The saturated acetates or MEM ethers were separated from the hydrogenolysis products using silica gel columns and were thus obtained in >95 % purity (<sup>1</sup>H and <sup>13</sup>C NMR) as colorless oils.

The hydrogenation of **3** (305 mg) in Et<sub>2</sub>O (30 mL) was carried out using 10% Pd/C from another supplier (80 mg, Merck, batch no. 34627). After filtration and evaporation of the solvent the crude product was carefully analyzed by <sup>1</sup>H and <sup>13</sup>C NMR at 400 and 100 MHz respectively. The ratio of *cis*-**9** to *trans*-**9** was >99/<1. The yield of the byproduct formed by hydrogenolysis was ca. 20-22%, which is less than with the other catalyst.

**cis-4-Acetoxy-6-methyl-1-oxacyclohexan-2-one (9)**, 40% yield; indistinguishable (<sup>1</sup>H NMR, GLC) from the acetate prepared by acetylation of **7** (*cis*). <sup>1</sup>H NMR data are given in Table A. <sup>13</sup>C NMR data are presented above.

**cis-4-[(2-Methoxyethoxy)methoxy]-6-methyl-1-oxacyclohexan-2-one (10)**, 81% yield; indistinguishable (<sup>1</sup>H NMR, GLC) from the MEM ether prepared from **7**. <sup>1</sup>H NMR data are given in Table A.

**all-cis-4-Acetoxy-3,6-dimethyl-1-oxacyclohexan-2-one (11)**, 40% yield; <sup>1</sup>H NMR data are given in Table A; <sup>13</sup>C NMR: δ 173.3, 170.4, 71.8, 69.7, 37.6, 37.5, 20.9, 20.8, 11.0. FAB MS: *m/z* 187 (M+H<sup>+</sup>), 127 (M+H<sup>+</sup>-HOAc); HR-FAB MS: *m/z* 187.0965; calc. for C<sub>9</sub>H<sub>15</sub>O<sub>4</sub>: 187.0971.

**all-cis-4-[(2-Methoxyethoxy)methoxy]-3,6-dimethyl-1-oxacyclohexan-2-one (12)**, 88% yield; <sup>1</sup>H NMR data are given in Table A; <sup>13</sup>C NMR (CDCl<sub>3</sub>, two signals coincide): δ 174.0, 94.1, 72.2, 71.7, 67.3, 59.1, 39.0, 36.8, 21.2, 11.5; <sup>13</sup>C NMR in acetone-d<sub>6</sub>: δ 174.0, 94.8, 73.5, 72.5, 72.3, 67.9, 58.8, 39.3, 38.0, 21.3, 11.9. FAB MS: *m/z* 255 (M+Na<sup>+</sup>), 233 (M+H<sup>+</sup>), 218 (M+H<sup>+</sup>-CH<sub>3</sub>), 217; HR-FAB MS: *m/z* 233.1404; calc. for C<sub>11</sub>H<sub>21</sub>O<sub>5</sub>: 233.1389.

**r-4-Acetoxy-c-6-ethyl-t-5-methyl-1-oxacyclohexan-2-one (17)**, 48% yield; <sup>1</sup>H NMR data are given in Table A; <sup>13</sup>C NMR: δ 170.3, 169.9, 82.8, 71.8, 38.0, 35.4, 25.7, 21.0, 14.2, 8.8. FAB MS: *m/z* 201 (M+H<sup>+</sup>), 141 (M+H<sup>+</sup>-HOAc); HR-FAB MS: *m/z* 201.1128; calc. for C<sub>10</sub>H<sub>17</sub>O<sub>4</sub>: 201.1127.

**c-6-Ethyl-r-4-[(2-methoxyethoxy)methoxy]-t-5-methyl-1-oxacyclohexan-2-one (18)**, 95% yield; <sup>1</sup>H NMR data are given in Table A; <sup>13</sup>C NMR: δ 169.9, 93.6, 82.1, 74.5, 70.6, 66.3, 58.0, 37.9, 35.3, 24.8, 13.4, 7.8. FAB MS: *m/z* 269 (M+Na<sup>+</sup>), 247 (M+H<sup>+</sup>), 141 (M+H<sup>+</sup>-HOCH<sub>2</sub>OCH<sub>2</sub>CH<sub>2</sub>OCH<sub>3</sub>); HR-FAB MS: *m/z* 247.1533; calc. for C<sub>12</sub>H<sub>23</sub>O<sub>5</sub>: 247.1546.

## References

- (64) Scott, A. I.; Guilford, H.; Skingle, D. *Tetrahedron*, **1971**, 27, 3039-3049.
- (65) Allen, F. H.; Kennard, O. *Chemical Design Automation News* **1993**, 8, pp. 1 & 31-37.
- (66) (a) Bergerhoff, G. **1996**. DIAMOND. Gerhard-Domagk-Strasse 1, 53121 Bonn, Germany.  
(b) Bergerhoff, G.; Berndt, M.; Brandenburg, K. *J. Res. Natl. Inst. Stand. Technol.* **1996**, 101, 221-225. (c) <http://www.crystalimpact.com/diamond/>
- (67) Chang, G.; Guida, W. C.; Still, W. C. *J. Am. Chem. Soc.* **1989**, 111, 4379-4386.
- (68) Mohamadi, F.; Richards, N. G. J.; Guida, W. C.; Liskamp, R.; Lipton, M.; Caufield, C.; Chang, G.; Hendrickson, T.; Still, W. C. *J. Comput. Chem.* **1990**, 11, 440-467.
- (69) MacSpartan Pro is available from Wavefunction, Inc., 18401 Von Karman Avenue, Suite 370, Irvine, CA 92612.
- (70) Jaguar 4.2 is available from Schrödinger, Inc., Portland, Oregon, 2000.
- (71) (a) Haasnoot, C. A. G.; De Leeuw, F. A. A. M.; Altona, C. *Tetrahedron*, **1980**, 36, 2783-2792. (b) Garbisch, E. W., Jr. *J. Am. Chem. Soc.* **1964**, 86, 5561-5564.
- (72) Numata, A., Hokimoto, K., Takemura, T., Katsuno, T., Yamamoto, K. *Chem. Pharm. Bull.* **1984**, 32, 2815-2820.
